# Supplementary material for: Development and Characterization of Activated Carbon from Olive Pomace: Experimental Design, Kinetic and Equilibrium Studies in Nimesulide Adsorption
Source: MDPI journal article supplement (doi:10.3390/ma14226820), 2021-11-11
Supplement: s1 [file s1]

**Table S1.** Nimesulide molecular structure and physical chemical properties.

| Parameter                               | Character/Value                                                                    |
|-----------------------------------------|------------------------------------------------------------------------------------|
| Molecular structure                     | 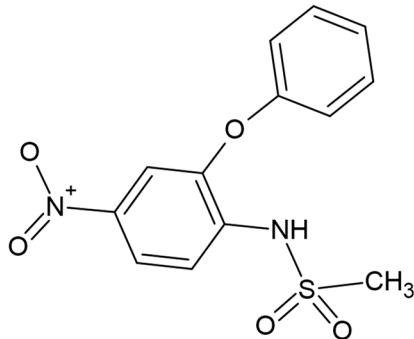 |
| Molecular formula                       | C <sub>13</sub> H <sub>12</sub> N <sub>2</sub> O <sub>5</sub> S                    |
| Molecular weight (g mol <sup>-1</sup> ) | 308,311                                                                            |
| Wavelength $\lambda_{\text{max}}$ (nm)  | 392                                                                                |

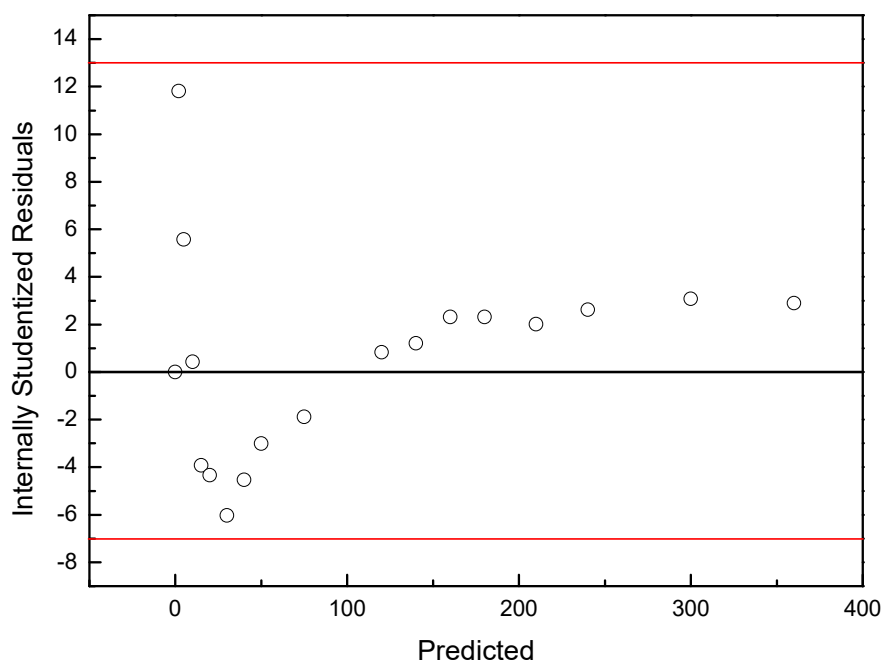

**Figure S1.** Residuals versus the predicted plot for PFO model.

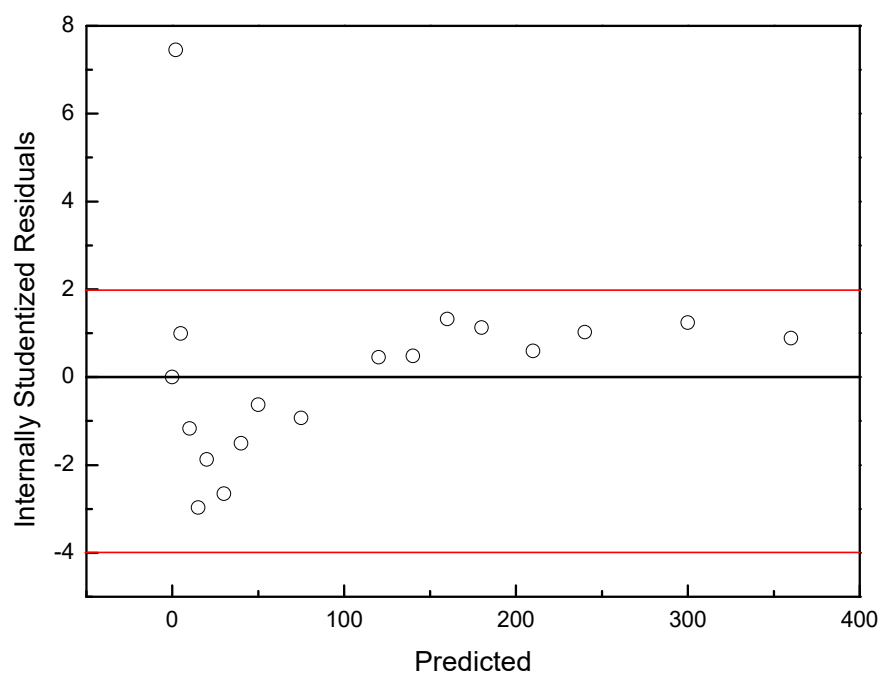

**Figure S2.** Residuals versus the predicted plot for PSO model.

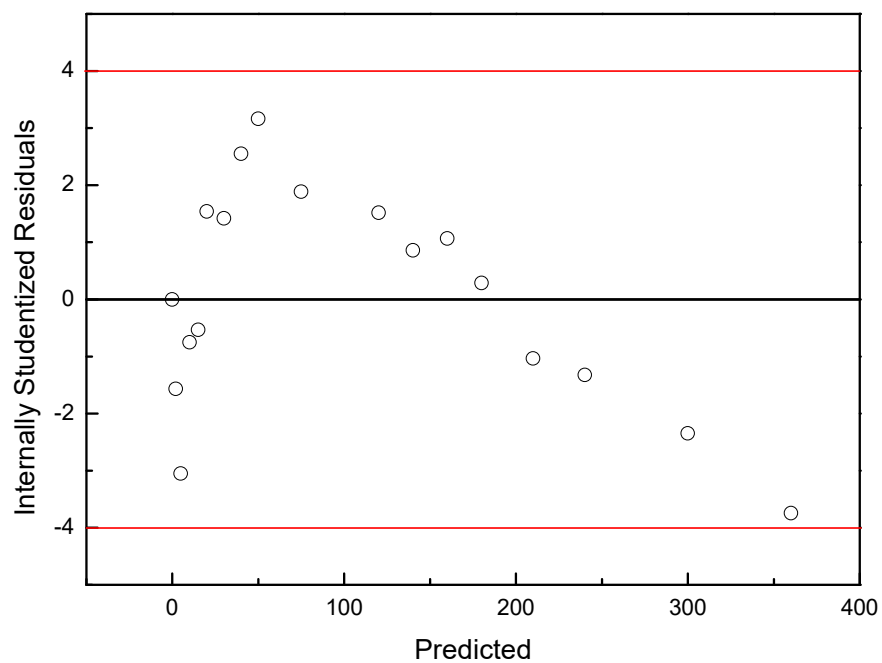

**Figure S3.** Residuals versus the predicted plot for Elovich model.
